# Supplementary material for: A method for estimating the risk of drug-induced phototoxicity and its application to smoothened inhibitors
Source: Royal Society of Chemistry journal article supplement (doi:10.1039/c1md00144b), 2011-01-01
Supplement: c1md00144b.csv [file c1md00144b.csv]

NAME
ABACAVIR
ACAMPROSATE
ACARBOSE
ACEBUTOLOL
ACETAMINOPHEN
ACETAZOLAMIDE
ACETOHEXAMIDE
ACETOHYDROXAMICACID
ACETOPHENAZINE
ACETYLCYSTEINE
ACETYLSALICYLICACID
ACITRETIN
ACRIVASTINE
ACYCLOVIR
ADEFOVIRDIPIVOXIL
ALBENDAZOLE
ALBUTEROL
ALENDRONATE
ALFACALCIDOL
ALFUZOSIN
ALLOPURINOL
ALMOTRIPTAN
ALOSETRON
ALPRAZOLAM
ALTRETAMINE
AMANTADINE
AMBENONIUM
AMBROXOL
AMILORIDE
AMINOBENZOATE
AMINOCAPROICACID
AMINOGLUTETHIMIDE
AMINOSALICYLATE
AMIODARONE
AMISULPRIDE
AMITRIPTYLINE
AMLODIPINE
AMODIAQUINE
AMOXAPINE
AMOXICILLIN
AMPHOTERICINB
AMPRENAVIR
ANAGRELIDE
ANASTROZOLE
ANILERIDINE
ANISINDIONE
ANISOTROPINE
APREPITANT
ARIPIPRAZOLE
ATAZANAVIR
ATENOLOL
ATOMOXETINE
ATORVASTATIN
ATOVAQUONE
ATROPINE
AZATADINE
AZATHIOPRINE
AZITHROMYCIN
BACAMPACILLIN
BACLOFEN
BALSALAZIDE
BENAZEPRIL
BENDROFLUMETHIAZIDE
BENSERAZIDE
BENTIROMIDE
BENZOICACID
BENZONATATE
BENZPHETAMINE
BENZTHIAZIDE
BENZTROPINE
BEPRIDIL
BETAINE
BETAMETHASONE
BETAXOLOL
BETHANECHOL
BETHANIDINE
BEXAROTENE
BICALUTAMIDE
BIPERIDEN
BISACODYL
BISOPROLOL
BOSENTAN
BROMAZEPAM
BROMFENAC
BROMOCRIPTINE
BROMODIPHENHYDRAMINE
BROMPHENIRAMINE
BUCLIZINE
BUMETANIDE
BUPROPION
BUSPIRONE
BUSULFAN
BUTABARBITAL
BUTALBITAL
CABERGOLINE
CAFFEINE
CALCIFEDIOL
CALCITRIOL
CANDESARTANCILEXETIL
CAPECITABINE
CAPTOPRIL
CARBAMAZEPINE
CARBENICILLIN
CARBIDOPA
CARBINOXAMINE
CARISOPRODOL
CARPHENAZINE
CARPROFEN
CARTEOLOL
CARVEDILOL
CEFACLOR
CEFADROXIL
CEFDINIR
CEFDITORINPIVOXIL
CEFIXIME
CEFPODOXIMEPROXETIL
CEFPROZIL
CEFTIBUTEN
CEFUROXIMEAXETIL
CELECOXIB
CEPHALEXIN
CEPHALOGLYCIN
CEPHRADINE
CERIVASTATIN
CETIRIZINE
CETRAXATE
CEVIMELINE
CHLOPHEDIANOL
CHLORAMBUCIL
CHLORAMPHENICOL
CHLORDIAZEPOXIDE
CHLORMEZANONE
CHLOROQUINE
CHLOROTHEOPHYLLINE
CHLOROTHIAZIDE
CHLOROTRIANISENE
CHLORPHENESIN
CHLORPHENIRAMINE
CHLORPHENTERMINE
CHLORPROMAZINE
CHLORPROPAMIDE
CHLORPROTHIXENE
CHLORTHALIDONE
CHLORZOXAZONE
CHOLESTYRAMINE
CILOSTAZOL
CIMETIDINE
CINACALCET
CINOXACIN
CIPROFLOXACIN
CISAPRIDE
CITALOPRAM
CLARITHROMYCIN
CLAVULANATE
CLEMASTINE
CLIDINIUM
CLINDAMYCIN
CLOFIBRATE
CLOMIPHENE
CLOMIPRAMINE
CLONAZEPAM
CLONIDINE
CLOPIDOGREL
CLORAZEPATE
CLOTRIMAZOLE
CLOXACILLIN
CLOZAPINE
CODEINE
COLCHICINE
CORTISONEACETATE
CROMOLYN
CYCLACILLIN
CYCLOBENZAPRINE
CYCLOPHOSPHAMIDE
CYCLOSERINE
CYCLOSPORINE
CYCLOTHIAZIDE
CYCRIMINE
CYPROHEPTADINE
CYSTEAMINE
DANAZOL
DANTROLENE
DAPSONE
DARIFENACIN
DELAVIRDINE
DEMECLOCYCLINE
DESERPIDINE
DESIPRAMINE
DESLORATADINE
DESMOPRESSIN
DESOGESTREL
DEXAMETHASONE
DEXTROAMPHETAMINE
DEXTROMETHORPHAN
DIAZEPAM
DIAZOXIDE
DICHLORPHENAMIDE
DICLOFENAC
DICLOXACILLIN
DICUMAROL
DICYCLOMINE
DIDANOSINE
DIETHYLCARBAMAZINE
DIETHYLPROPION
DIETHYLSTILBESTROL
DIFLUNISAL
DILTIAZEM
DIPHEMANIL
DIPHENHYDRAMINE
DIPHENIDOL
DIPHENYLPYRALINE
DIPYRIDAMOLE
DISOPYRAMIDE
DISULFIRAM
DOCUSATE
DOFETILIDE
DONEPEZIL
DOXAZOSIN
DOXEPIN
DOXERCALCIFEROL
DOXIFLURIDINE
DOXYCYCLINE
DOXYLAMINE
DRONABINOL
DROSPIRENONE
DULOXETINE
DYPHYLLINE
EFAVIRENZ
ELETRIPTAN
EMTRICITABINE
ENALAPRIL
ENOXACIN
ENTACAPONE
EPHEDRINE
EPROSARTAN
ERGOCALCIFEROL
ERGOTAMINE
ERLOTINIB
ERYTHROMYCIN
ESTAZOLAM
ESTRADIOL
ESTRAMUSTINE
ESTROPIPATE
ESZOPICLONE
ETHACRYNICACID
ETHAMBUTOL
ETHCHLORVYNOL
ETHINAMATE
ETHINYLESTRADIOL
ETHIONAMIDE
ETHOPROPAZINE
ETHOSUXIMIDE
ETHOTOIN
ETHOXZOLAMIDE
ETHYLESTRENOL
ETHYNODIOL
ETIDRONATE
ETODOLAC
ETOPOSIDE
ETRETINATE
EXEMESTANE
EZETIMIBE
FAMCICLOVIR
FAMOTIDINE
FAROPENEM
FELBAMATE
FELODIPINE
FENOFIBRATE
FENOPROFEN
FENTANYL
FEXOFENADINE
FLAVOXATE
FLECAINIDE
FLUCONAZOLE
FLUCYTOSINE
FLUDROCORTISONE
FLUOXETINE
FLUPHENAZINE
FLUPREDNISOLONE
FLURAZEPAM
FLURBIPROFEN
FLUTAMIDE
FLUVASTATIN
FLUVOXAMINE
FOLICACID
FOSAMPRENAVIR
FOSFOMYCIN
FOSINOPRIL
FROVATRIPTAN
FURAZOLIDONE
FUROSEMIDE
GABAPENTIN
GALANTAMINE
GANCICLOVIR
GATIFLOXACIN
GEFITINIB
GEMFIBROZIL
GEMIFLOXACIN
GLIMEPIRIDE
GLIPIZIDE
GLUTETHIMIDE
GLYBURIDE
GLYCOPYRROLATE
GRANISETRON
GRISEOFULVIN
GUAIFENESIN
GUANABENZ
GUANADREL
GUANETHIDINE
GUANFACINE
GUANIDINE
HALAZEPAM
HALOFANTRINE
HALOPERIDOL
HETACILLIN
HEXOCYCLIUM
HOMATROPINE
HYDRALAZINE
HYDROCHLOROTHIAZIDE
HYDROCODONE
HYDROCORTISONE
HYDROFLUMETHIAZIDE
HYDROMORPHONE
HYDROXYCHLOROQUINE
HYDROXYUREA
HYDROXYZINE
IBANDRONATE
IBUPROFEN
IMATINIB
IMIPRAMINE
INDAPAMIDE
INDECAINIDE
INDINAVIR
INDOMETHACIN
IRBESARTAN
ISOCARBOXAZID
ISONIAZID
ISOPROPAMIDE
ISOSORBIDE
ISOSORBIDEDINITRATE
ISOSORBIDEMONONITRATE
ISRADIPINE
ITRACONAZOLE
KANAMYCINA1
KETOCONAZOLE
KETOPROFEN
KETOROLAC
LABETALOL (R,R)
LAMIVUDINE
LAMOTRIGINE
LANSOPRAZOLE
LEFLUNOMIDE
LENALIDOMIDE
LETROZOLE
LEUCOVORIN
LEVAMISOLE
LEVOCARNITINE
LEVODOPA
LEVONORGESTREL
LEVORPHANOL
LEVOTHYROXINE
LEVTIRACETAM
LIDOCAINE
LINCOMYCINA
LINEZOLID
LIOTHYRONINE
LISINOPRIL
LOMEFLOXACIN
LOMUSTINE
LOPERAMIDE
LOPINAVIR
LORACARBEF
LORATADINE
LORAZEPAM
LOSARTAN
LOVASTATIN
LOXAPINE
LOXOPROFEN
MAPROTILINE
MAZINDOL
MEBENDAZOLE
MEBUTAMATE
MECLIZINE
MECLOFENAMATE
MEDROXYPROGESTERONE
MEFENAMICACID
MEFLOQUINE
MELOXICAM
MELPHALAN
MEMANTINE
MENADIOL
MENADIONE
MEPENZOLATE
MEPERIDINE
MEPHENYTOIN
MEPHOBARBITAL
MEPREDNISONE
MEPROBAMATE
MERCAPTOPURINE
MESALAMINE
MESNA
MESORIDAZINE
MESTRANOL
METAPROTERENOL
METAXALONE
METFORMIN
METHACYCLINE
METHADONE
METHAMPHETAMINE
METHANTHELINE
METHARBITAL
METHAZOLAMIDE
METHDILAZINE
METHENAMINE
METHIMAZOLE
METHIXENE
METHOCARBAMOL
METHOTREXATE
METHOXSALEN
METHSCOPOLAMINE
METHSUXIMIDE
METHYCLOTHIAZIDE
METHYLDOPA
METHYLENEBLUE
METHYLERGONOVINE
METHYLPHENIDATE
METHYLPREDNISOLONE
METHYLTESTOSTERONE
METHYPRYLON
METHYSERGIDE
METOCLOPRAMIDE
METOLAZONE
METOPROLOL
METRONIDAZOLE
METYRAPONE
METYROSINE
MEXILETINE
MIDAZOLAM
MIDODRINE
MIFEPRISTONE
MIGLITOL
MIGLUSTAT
MINOCYCLINE
MINOXIDIL
MIRTAZAPINE
MISOPROSTOL
MITOTANE
MODAFINIL
MOEXIPRIL
MOLINDONE
MONTELUKAST
MORICIZINE
MORPHINE
MOXIFLOXACIN
MYCOPHENOLATEMOFETIL
MYCOPHENOLICACID
NABILONE
NABUMETONE
NADOLOL
NAFCILLIN
NALIDIXICACID
NALOXONE
NALTREXONE
NAPROXEN
NARATRIPTAN
NATEGLINIDE
NEFAZODONE
NELFINAVIR
NEOMYCIN_B
NEVIRAPINE
NIACIN
NIACINAMIDE
NICARDIPINE
NICLOSAMIDE
NICORANDIL
NIFEDIPINE
NILUTAMIDE
NILVADIPINE
NIMODIPINE
NISOLDIPINE
NITAZOXANIDE
NITISINONE
NITROFURANTOIN
NIZATIDINE
NORETHINDRONE
NORETHYNODREL
NORFLOXACIN
NORTRIPTYLINE
NOVOBIOCIN
NYSTATIN_A1
OFLOXACIN
OLANZAPINE
OLMESARTAN_MEDOXOMIL
OLSALAZINE
OMEPRAZOLE
ONDANSETRON
ORLISTAT
ORPHENADRINE
OSELTAMIVIR
OXACILLIN
OXAMNIQUINE
OXANDROLONE
OXAPROZIN
OXAZEPAM
OXCARBAZEPINE
OXPRENOLOL
OXTRIPHYLLINE
OXYBATE
OXYBUTYNIN
OXYCODONE
OXYMETHOLONE
OXYPHENBUTAZONE
OXYPHENCYCLIMINE
OXYPHENONIUM
OXYTETRACYCLINE
PAMABROM
PANTOPRAZOLE
PARAMETHADIONE
PARAMETHASONE_ACETATE
PARGYLINE
PAROMOMYCIN
PAROXETINE
PENBUTOLOL
PENICILLAMINE
PENICILLIN_G
PENICILLIN_V
PENTAZOCINE
PENTOBARBITAL
PENTOXIFYLLINE
PERGOLIDE
PERINDOPRIL
PERPHENAZINE
PHENACEMIDE
PHENAZOPYRIDINE
PHENDIMETRAZINE
PHENELZINE
PHENINDIONE
PHENMETRAZINE
PHENOXYBENZAMINE
PHENPROCOUMON
PHENSUXIMIDE
PHENTERMINE
PHENYLAMINOSALICYLATE
PHENYLBUTAZONE
PHENYLBUTYRATE
PHENYLEPHRINE
PHENYLPROPANOLAMINE
PHENYLSALICYLATE
PHENYTOIN
PHYTONADIONE
PILOCARPINE
PILSICAINIDE
PIMOZIDE
PINACIDIL
PIOGLITAZONE
PIPERACETAZINE
PIPOBROMAN
PIROXICAM
POLYTHIAZIDE
PRALIDOXIME
PRAMIPEXOLE
PRAVASTATIN
PRAZEPAM
PRAZIQUANTEL
PRAZOSIN
PREDNISOLONE
PREDNISONE
PREGABALIN
PRIMAQUINE
PRIMIDONE
PROBENECID
PROBUCOL
PROCAINAMIDE
PROCARBAZINE
PROCHLORPERAZINE
PROCYCLIDINE
PROGESTERONE
PROGUANIL
PROMETHAZINE
PROPAFENONE
PROPANTHELINE
PROPOXYPHENE
PROPRANOLOL
PROPYLTHIOURACIL
PROTOKYLOL
PROTRIPTYLINE
PSEUDOEPHEDRINE
PYRAZINAMIDE
PYRIDOSTIGMINE
PYRIDOXINE
PYRILAMINE
PYRIMETHAMINE
PYRVINIUM
QUAZEPAM
QUETIAPINE
QUINAPRIL
QUINESTROL
QUINETHAZONE
QUINIDINE
RABEPRAZOLE
RALOXIFENE
RAMELTEON
RAMIPRIL
RANITIDINE
REPAGLINIDE
RESCINNAMINE
RESERPINE
RIBAVIRIN
RIFABUTIN
RIFAMPIN
RIFAPENTINE
RIFAXIMIN
RILUZOLE
RIMANTADINE
RISEDRONATE
RISPERIDONE
RITODRINE
RITONAVIR
RIVASTIGMINE
RIZATRIPTAN
ROPINIROLE
ROSIGLITAZONE
ROSUVASTATIN
SAQUINAVIR
SECOBARBITAL
SELEGILINE
SERTRALINE
SIBUTRAMINE
SILDENAFIL
SIMVASTATIN
SOLIFENACIN
SORAFENIB
SOTALOL
SPARFLOXACIN
SPIRAPRIL
SPIRONOLACTONE
STANOZOLOL
STAVUDINE
SUCRALFATE
SULFACYTINE
SULFADIAZINE
SULFADOXINE
SULFAMERAZINE
SULFAMETER
SULFAMETHAZINE
SULFAMETHIZOLE
SULFAMETHOXAZOLE
SULFAPHENAZOLE
SULFAPYRIDINE
SULFASALAZINE
SULFINPYRAZONE
SULFISOXAZOLE
SULFOXONE
SULINDAC
SULPIRIDE
SUMATRIPTAN
TACRINE
TADALAFIL
TALBUTAL
TAMOXIFEN
TAMSULOSIN
TEGASEROD
TELITHROMYCIN
TELMISARTAN
TEMAZEPAM
TEMOCAPRIL
TEMOZOLOMIDE
TENOFOVIRDIOPROXIL
TERAZOSIN
TERBINAFINE
TERBUTALINE
TESTOLACTONE
TETRACYCLINE
THALIDOMIDE
THEOPHYLLINE
THIABENDAZOLE
THIETHYLPERAZINE
THIOGUANINE
THIORIDAZINE
THIOTHIXENE
TIAGABINE
TIBOLONE
TICLOPIDINE
TILUDRONATE
TIMOLOL
TINIDAZOLE
TIOPRONIN
TIPRANAVIR
TIZANIDINE
TOCAINIDE
TOLAZAMIDE
TOLBUTAMIDE
TOLCAPONE
TOLMETIN
TOLTERODINE
TOPIRAMATE
TOREMIFENE
TORSEMIDE
TRAMADOL
TRANDOLAPRIL
TRANEXAMICACID
TRANYLCYPROMINE
TRAZODONE
TRETINOIN
TRIAMTERENE
TRIAZOLAM
TRICHLORMETHIAZIDE
TRICLOFOS
TRIDIHEXETHYL
TRIENTINE
TRIFLUOPERAZINE
TRIFLUPROMAZINE
TRIHEXYPHENIDYL
TRILOSTANE
TRIMEPRAZINE
TRIMETHADIONE
TRIMETHOBENZAMIDE
TRIMETHOPRIM
TRIMIPRAMINE
TRIOXSALEN
TRIPELENNAMINE
TRIPROLIDINE
TROSPIUMCHLORIDE
TROVAFLOXACIN
URACILMUSTARD
UREA
VALACYCLOVIR
VALGANCICLOVIR
VALPROICACID
VALSARTAN
VARDENAFIL
VENLAFAXINE
VERAPAMIL
VITAMIN_A
VORICONAZOLE
WARFARIN
ZAFIRLUKAST
ZALCITABINE
ZALEPLON
ZIDOVUDINE
ZILEUTON
ZIPRASIDONE
ZOLMITRIPTAN
ZOLPIDEM
ZONISAMIDE
